# Supplementary material for: Genetic Characterization of Avian Paramyxovirus Isolated from Wild Waterfowl in Korea between 2015 and 2021
Source: MDPI journal article supplement (doi:10.3390/ani14050780), 2024-03-01
Supplement: s1 [file s1]

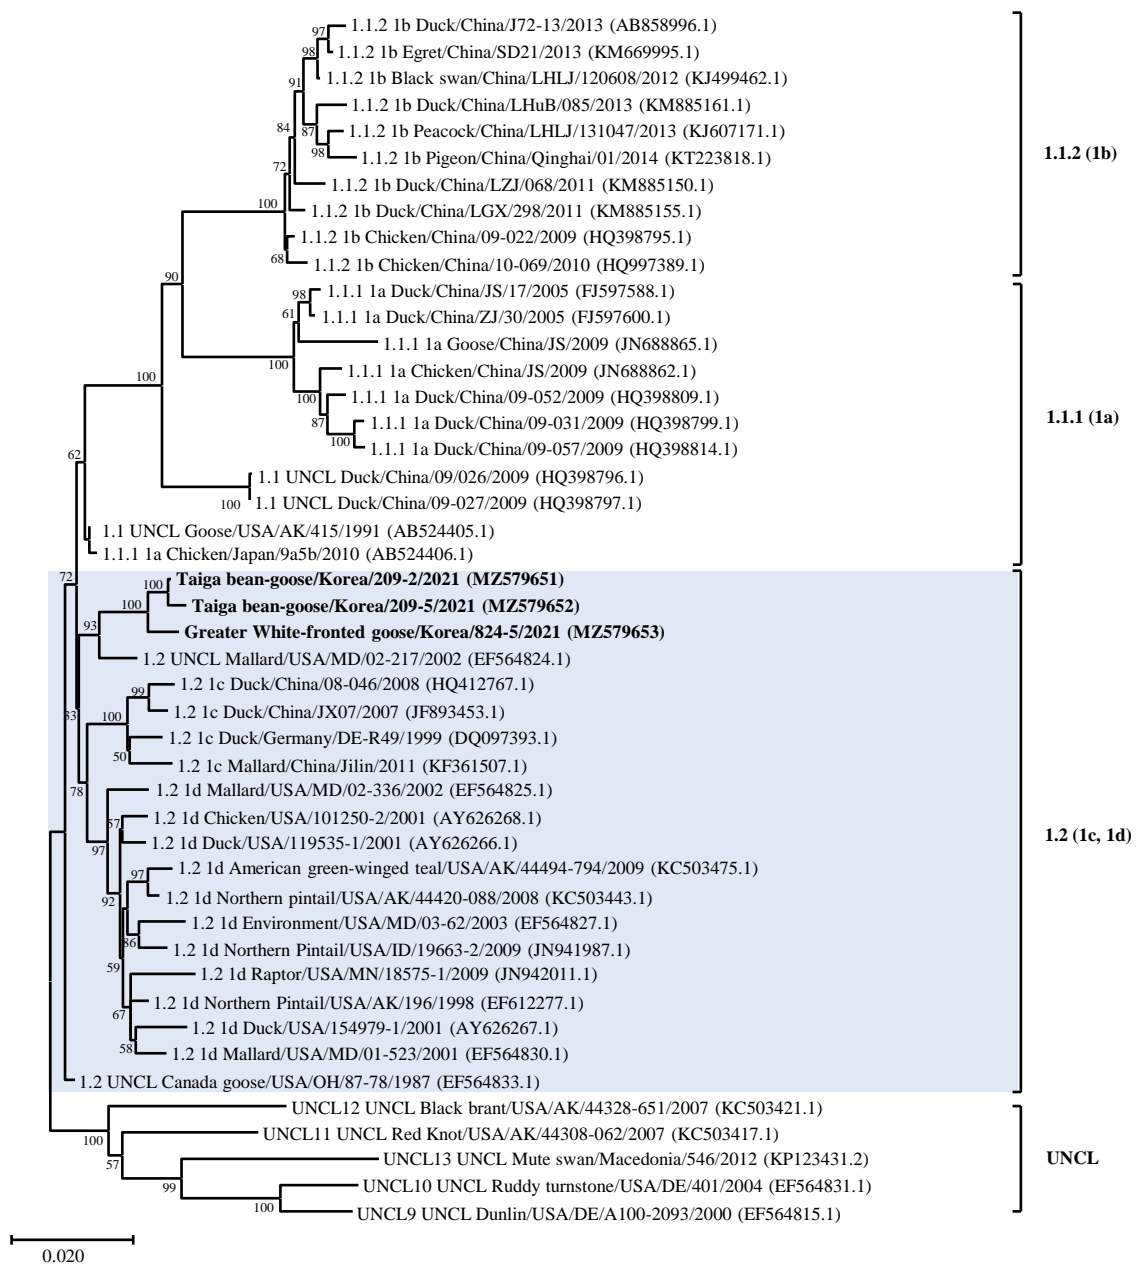

**Figure S4** | Phylogenetic analyses based on the full-length nucleotide sequence of the fusion gene of isolates representing APMV-1 class I isolates. Viruses described in this study are designated in bold. The new (decimal naming) and the former names (alpha-numerical) of genotype or sub-genotype in APMV-1 are provided for easier comparison. The genotypes to which the newly isolated virus belongs are color-highlighted for emphasis.
