# Supplementary material for: Genetic Characterization of Avian Paramyxovirus Isolated from Wild Waterfowl in Korea between 2015 and 2021
Source: MDPI journal article supplement (doi:10.3390/ani14050780), 2024-03-01
Supplement: s1 [file s1]

## Supplementary Materials

**Table S1.** Prevalence of APMVs in waterfowls from Korea during 2015-2021\*.

| Year         | No. of samples | No. of isolates | Positive rate (%) |
|--------------|----------------|-----------------|-------------------|
| 2015         | 382            | -               | -                 |
| 2016         | 127            | 3               | 2.4               |
| 2017         | 188            | 3               | 1.6               |
| 2018         | 256            | -               | -                 |
| 2019         | 207            | -               | -                 |
| 2020         | 331            | 5               | 1.5               |
| 2021         | 45             | 3               | 6.7               |
| <b>Total</b> | 1,536          | 14              | 0.9               |

\*, the 14 isolates were HA and RT-PCR positive for APMV; -, no samples were included.

**Table S2.** Seasonal prevalence of APMVs in wild waterfowls from Korea during 2015-2021 <sup>\*</sup>.

| Season | No. of samples | No. of isolates | Positive rate (%) |
|--------|----------------|-----------------|-------------------|
| Spring | 223            | 1               | 0.4               |
| Summer | 85             | -               | -                 |
| Autumn | 534            | 10              | 1.9               |
| Winter | 694            | 3               | 0.4               |

<sup>\*</sup>, the 14 isolates were HA and RT-PCR positive for APMV; -, no samples were included.

**Table S3.** APMV isolates for Phylogenetic Analysis.

| No. | Virus                         | Genus                  | Strains                                     | Accession number |
|-----|-------------------------------|------------------------|---------------------------------------------|------------------|
| 1   | Avian paramyxovirus 1(APMV-1) | <i>Orthoavulavirus</i> | AG/CH/HLJ070/06                             | KY776591.1       |
| 2   | Avian paramyxovirus 1(APMV-1) | <i>Orthoavulavirus</i> | go/CH/GD-QY/1997                            | KJ782375.1       |
| 3   | Avian paramyxovirus 1(APMV-1) | <i>Orthoavulavirus</i> | MB076/05                                    | KR074406.1       |
| 4   | Avian paramyxovirus 1(APMV-1) | <i>Orthoavulavirus</i> | chicken/Banjarmasin/010/10                  | HQ697254.1       |
| 5   | Avian paramyxovirus 1(APMV-1) | <i>Orthoavulavirus</i> | Peacock/MZS-UVAS-Pak/2014                   | KU885948.1       |
| 6   | Avian paramyxovirus 1(APMV-1) | <i>Orthoavulavirus</i> | Anas carolinensis-II/UVAS/Pak/2015          | MF437287.1       |
| 7   | Avian paramyxovirus 1(APMV-1) | <i>Orthoavulavirus</i> | Anas carolinensis-I/UVAS/Pak/2015           | MF437286.1       |
| 8   | Avian paramyxovirus 1(APMV-1) | <i>Orthoavulavirus</i> | Altai/pigeon/777/2010                       | KT962979.1       |
| 9   | Avian paramyxovirus 1(APMV-1) | <i>Orthoavulavirus</i> | AAvV-1/cormorant/Alakol/6952/2016           | MK693033.1       |
| 10  | Avian paramyxovirus 1(APMV-1) | <i>Orthoavulavirus</i> | 96-15                                       | MF422125.1       |
| 11  | Avian paramyxovirus 1(APMV-1) | <i>Orthoavulavirus</i> | 110-13A                                     | MF422123.1       |
| 12  | Avian paramyxovirus 1(APMV-1) | <i>Orthoavulavirus</i> | 805-13B                                     | MF422127.1       |
| 13  | Avian paramyxovirus 1(APMV-1) | <i>Orthoavulavirus</i> | APMV-1/chicken/Ca/2098/71                   | JQ247691.1       |
| 14  | Avian paramyxovirus 1(APMV-1) | <i>Orthoavulavirus</i> | 410/16A                                     | MF422129.1       |
| 15  | Avian paramyxovirus 1(APMV-1) | <i>Orthoavulavirus</i> | 229-13B                                     | MF422124.1       |
| 16  | Avian paramyxovirus 1(APMV-1) | <i>Orthoavulavirus</i> | pigeon/Pakistan/Lahore/21A/2015             | KX236100.2       |
| 17  | Avian paramyxovirus 1(APMV-1) | <i>Orthoavulavirus</i> | V4                                          | AF217084.1       |
| 18  | Avian paramyxovirus 1(APMV-1) | <i>Orthoavulavirus</i> | A5136                                       | MW342807.1       |
| 19  | Avian paramyxovirus 1(APMV-1) | <i>Orthoavulavirus</i> | A142                                        | MW342806.1       |
| 20  | Avian paramyxovirus 1(APMV-1) | <i>Orthoavulavirus</i> | 3FB28                                       | MW342780.1       |
| 21  | Avian paramyxovirus 1(APMV-1) | <i>Orthoavulavirus</i> | 22516                                       | KX822746.1       |
| 22  | Avian paramyxovirus 1(APMV-1) | <i>Orthoavulavirus</i> | IR12                                        | MH247189.1       |
| 23  | Avian paramyxovirus 1(APMV-1) | <i>Orthoavulavirus</i> | LaSota                                      | AY845400.2       |
| 24  | Avian paramyxovirus 1(APMV-1) | <i>Orthoavulavirus</i> | KR/CK/KU LBM255/09                          | JQ966086.1       |
| 25  | Avian paramyxovirus 1(APMV-1) | <i>Orthoavulavirus</i> | chicken/N. Ireland/Ulster/67                | AY562991.1       |
| 26  | Avian paramyxovirus 1(APMV-1) | <i>Orthoavulavirus</i> | Anseriformes/Taiwan/AHRI106/2016            | MN632512.1       |
| 27  | Avian paramyxovirus 1(APMV-1) | <i>Orthoavulavirus</i> | Anseriformes/Taiwan/AHRI85/2014             | MN632511.1       |
| 28  | Avian paramyxovirus 1(APMV-1) | <i>Orthoavulavirus</i> | AOAV-1/chicken/Belgium/6643/2018            | MN547990.1       |
| 29  | Avian paramyxovirus 1(APMV-1) | <i>Orthoavulavirus</i> | AOAV-1/chicken/Belgium/6295/2018            | MN547982.1       |
| 30  | Avian paramyxovirus 1(APMV-1) | <i>Orthoavulavirus</i> | AOAV-1/chicken/Belgium/5876/2018            | MN547976.1       |
| 31  | Avian paramyxovirus 1(APMV-1) | <i>Orthoavulavirus</i> | AOAV-1/chicken/Belgium/5630/2018            | MN547975.1       |
| 32  | Avian paramyxovirus 1(APMV-1) | <i>Orthoavulavirus</i> | AOAV-1/chicken/Luxembourg/18088367_368/2018 | MN547992.1       |
| 33  | Avian paramyxovirus 1(APMV-1) | <i>Orthoavulavirus</i> | AOAV-1/chicken/Belgium/6083/2018            | MN547981.1       |
| 34  | Avian paramyxovirus 1(APMV-1) | <i>Orthoavulavirus</i> | AOAV-1/chicken/Belgium/6047/2018            | MN547979.1       |
| 35  | Avian paramyxovirus 1(APMV-1) | <i>Orthoavulavirus</i> | AOAV-1/chicken/Belgium/5619/2018            | MN547974.1       |
| 36  | Avian paramyxovirus 1(APMV-1) | <i>Orthoavulavirus</i> | APMV-1/Anseriformes/Taiwan/AHRI171/2020     | MZ802789.1       |
| 37  | Avian paramyxovirus 1(APMV-1) | <i>Orthoavulavirus</i> | APMV1/Bassette chicken/Belgium/4096/2018    | MH432252.2       |
| 38  | Avian paramyxovirus 1(APMV-1) | <i>Orthoavulavirus</i> | APMV-1/Charadriiformes/Taiwan/AHRI145/2019  | MZ802790.1       |

|    |                               |                        |                                             |            |
|----|-------------------------------|------------------------|---------------------------------------------|------------|
| 39 | Avian paramyxovirus 1(APMV-1) | <i>Orthoavulavirus</i> | APMV-1/Rock Dove/NYC/USA/NYCVH/21-0052/2021 | OL518992.1 |
| 40 | Avian paramyxovirus 1(APMV-1) | <i>Orthoavulavirus</i> | APMV-1/Rock Dove/NYC/USA/NYCVH/21-0109/2021 | OL518991.1 |
| 41 | Avian paramyxovirus 1(APMV-1) | <i>Orthoavulavirus</i> | backyard/Pakistan/Lahore/SFR-144A/2016      | KX791184.1 |
| 42 | Avian paramyxovirus 1(APMV-1) | <i>Orthoavulavirus</i> | backyard/Pakistan/Lahore/SFR-144B/2016      | KX791185.1 |
| 43 | Avian paramyxovirus 1(APMV-1) | <i>Orthoavulavirus</i> | Bhopal                                      | KU885390.1 |
| 44 | Avian paramyxovirus 1(APMV-1) | <i>Orthoavulavirus</i> | BJ/1/15/Ck                                  | MK764388.1 |
| 45 | Avian paramyxovirus 1(APMV-1) | <i>Orthoavulavirus</i> | broiler/Indonesia/Muntilan-1P-I1/972/2014   | MN557401.1 |
| 46 | Avian paramyxovirus 1(APMV-1) | <i>Orthoavulavirus</i> | broiler/Indonesia/Muntilan-2L-I3/974/2014   | MN557403.1 |
| 47 | Avian paramyxovirus 1(APMV-1) | <i>Orthoavulavirus</i> | broiler_India_HR189A_ABT40_2015             | MT409237.1 |
| 48 | Avian paramyxovirus 1(APMV-1) | <i>Orthoavulavirus</i> | Buzzard/CH/HLJ013/06                        | KY776593.1 |
| 49 | Avian paramyxovirus 1(APMV-1) | <i>Orthoavulavirus</i> | C/GD/GZ/414/2016                            | MF100762.1 |
| 50 | Avian paramyxovirus 1(APMV-1) | <i>Orthoavulavirus</i> | Charadriiformes/Taiwan/AHRI44/2010          | MN632516.1 |
| 51 | Avian paramyxovirus 1(APMV-1) | <i>Orthoavulavirus</i> | Chicken embryos/China/16                    | MN747806.1 |
| 52 | Avian paramyxovirus 1(APMV-1) | <i>Orthoavulavirus</i> | chicken/Bulgaria/Dolno_Linevo/1160/1992     | KY042125.1 |
| 53 | Avian paramyxovirus 1(APMV-1) | <i>Orthoavulavirus</i> | chicken/Nigeria/JN/469/N44/892/2009         | KY171992.1 |
| 54 | Avian paramyxovirus 1(APMV-1) | <i>Orthoavulavirus</i> | chicken/Nigeria/KD/TW/03T/N45/720/2009      | KY171990.1 |
| 55 | Avian paramyxovirus 1(APMV-1) | <i>Orthoavulavirus</i> | chicken/Taiwan/AHRI103/2016                 | MN632524.1 |
| 56 | Avian paramyxovirus 1(APMV-1) | <i>Orthoavulavirus</i> | chicken/Ukraine/Bashtanivske/20-02/962/2013 | KU295455.2 |
| 57 | Avian paramyxovirus 1(APMV-1) | <i>Orthoavulavirus</i> | chicken/Zambia/Chiwoko/2015                 | MF409241.1 |
| 58 | Avian paramyxovirus 1(APMV-1) | <i>Orthoavulavirus</i> | Turtle dove/China/GX05/2017                 | MZ395249.1 |
| 59 | Avian paramyxovirus 1(APMV-1) | <i>Orthoavulavirus</i> | Spotted dove/China/GX06/2019                | MZ620696.1 |
| 60 | Avian paramyxovirus 1(APMV-1) | <i>Orthoavulavirus</i> | APMV-1/duck/Tottori/N12/2006                | AB871655.1 |
| 61 | Avian paramyxovirus 1(APMV-1) | <i>Orthoavulavirus</i> | AAvV1-NVNVacI2/Vietnam/2016                 | MG869263.1 |
| 62 | Avian paramyxovirus 1(APMV-1) | <i>Orthoavulavirus</i> | red knot/US(NJ)/A101-1383/2001              | EF564816.1 |
| 63 | Avian paramyxovirus 1(APMV-1) | <i>Orthoavulavirus</i> | BHG/Sweden/94                               | GQ918280.1 |
| 64 | Avian paramyxovirus 1(APMV-1) | <i>Orthoavulavirus</i> | slaty-backed gull/Japan/9KS-0098/2009       | KC503478.1 |
| 65 | Avian paramyxovirus 1(APMV-1) | <i>Orthoavulavirus</i> | NDV/Tyva/gull/14/2014                       | KX352834.1 |
| 66 | Avian paramyxovirus 1(APMV-1) | <i>Orthoavulavirus</i> | ruddy turnstone/US(DE)/492/2002             | EF564817.1 |
| 67 | Avian paramyxovirus 1(APMV-1) | <i>Orthoavulavirus</i> | red poll/Russia/Nikita530FFNK2/2008         | KC503479.1 |
| 68 | Avian paramyxovirus 1(APMV-1) | <i>Orthoavulavirus</i> | D_AH_5_04                                   | FJ597603.1 |
| 69 | Avian paramyxovirus 1(APMV-1) | <i>Orthoavulavirus</i> | D_ZJ_50_05                                  | FJ597616.1 |
| 70 | Avian paramyxovirus 1(APMV-1) | <i>Orthoavulavirus</i> | APMV-1/duck/Luxembourg/3785/2007            | HE972210.1 |
| 71 | Avian paramyxovirus 1(APMV-1) | <i>Orthoavulavirus</i> | spur-winged goose/Nigeria/NIE08-0124/2008   | HG326606.1 |
| 72 | Avian paramyxovirus 1(APMV-1) | <i>Orthoavulavirus</i> | KR/WB/KU17/08                               | JQ966077.1 |
| 73 | Avian paramyxovirus 1(APMV-1) | <i>Orthoavulavirus</i> | KR/WB/KU628/09                              | JQ966084.1 |
| 74 | Avian paramyxovirus 1(APMV-1) | <i>Orthoavulavirus</i> | 2009_Madagascar_MGA284C                     | JX518874.1 |
| 75 | Avian paramyxovirus 1(APMV-1) | <i>Orthoavulavirus</i> | northern pintail/Japan/10EY0020/2010        | KC503411.1 |
| 76 | Avian paramyxovirus 1(APMV-1) | <i>Orthoavulavirus</i> | Blue-winged teal/USA/TX/AI12-3663/2012      | KX857698.1 |
| 77 | Avian paramyxovirus 1(APMV-1) | <i>Orthoavulavirus</i> | NDV/Duck/CN/JX/2N/2016                      | MH289832.1 |
| 78 | Avian paramyxovirus 1(APMV-1) | <i>Orthoavulavirus</i> | KR-005/00                                   | KY404087.1 |
| 79 | Avian paramyxovirus 1(APMV-1) | <i>Orthoavulavirus</i> | 2011_Ethiopia_ETH10065                      | KC205475.1 |

|     |                               |                        |                                                          |             |
|-----|-------------------------------|------------------------|----------------------------------------------------------|-------------|
| 80  | Avian paramyxovirus 1(APMV-1) | <i>Orthoavulavirus</i> | SD18/13                                                  | KY284861.1  |
| 81  | Avian paramyxovirus 1(APMV-1) | <i>Orthoavulavirus</i> | Mandarin duck/Korea/2132-5/2020                          | MW464636    |
| 82  | Avian paramyxovirus 1(APMV-1) | <i>Orthoavulavirus</i> | Mandarin duck/Korea/2129-1/2020                          | MW464635    |
| 83  | Avian paramyxovirus 1(APMV-1) | <i>Orthoavulavirus</i> | Mandarin duck/Korea/2128-2/2020                          | MW464634    |
| 84  | Avian paramyxovirus 1(APMV-1) | <i>Orthoavulavirus</i> | Eurasian teal/Korea/1689-3-1/2020                        | MW464633    |
| 85  | Avian paramyxovirus 1(APMV-1) | <i>Orthoavulavirus</i> | Mallard/Korea/1310-4-4/2020                              | MW464632    |
| 86  | Avian paramyxovirus 1(APMV-1) | <i>Orthoavulavirus</i> | Indian spot-billed duck/Korea/92-8/2017                  | MW464631    |
| 87  | Avian paramyxovirus 1(APMV-1) | <i>Orthoavulavirus</i> | Mallard/Korea/92-1/2017                                  | MW464630    |
| 88  | Avian paramyxovirus 1(APMV-1) | <i>Orthoavulavirus</i> | Mandarin duck/Korea/231/2016                             | MW464629    |
| 89  | Avian paramyxovirus 1(APMV-1) | <i>Orthoavulavirus</i> | Mandarin duck/Korea/226/2016                             | MW464628    |
| 90  | Avian paramyxovirus 1(APMV-1) | <i>Orthoavulavirus</i> | Mandarin duck/Korea/201/2016                             | MW464627    |
| 91  | Avian paramyxovirus 1(APMV-1) | <i>Orthoavulavirus</i> | Taiga bean-goose/Korea/209-2/2021                        | MZ579651    |
| 92  | Avian paramyxovirus 1(APMV-1) | <i>Orthoavulavirus</i> | Taiga bean-goose/Korea/209-5/2021                        | MZ579652    |
| 93  | Avian paramyxovirus 1(APMV-1) | <i>Orthoavulavirus</i> | Greater white-fronted goose/Korea/824-5/2021             | MZ579653    |
| 94  | Avian paramyxovirus 2(APMV-2) | <i>Metaavulavirus</i>  | APMV-2/Chicken/England/7702/06                           | HM159993.1  |
| 95  | Avian paramyxovirus 2(APMV-2) | <i>Metaavulavirus</i>  | APMV-2/Chicken/California/Yucaipa/56                     | NC_039230.1 |
| 96  | Avian paramyxovirus 2(APMV-2) | <i>Metaavulavirus</i>  | NK                                                       | HQ896024.1  |
| 97  | Avian paramyxovirus 2(APMV-2) | <i>Metaavulavirus</i>  | rAPMV-2-Yuc/YmHA                                         | LC187306.1  |
| 98  | Avian paramyxovirus 2(APMV-2) | <i>Metaavulavirus</i>  | APV/chicken/California/Yucaipa/60                        | D13977.1    |
| 99  | Avian paramyxovirus 2(APMV-2) | <i>Metaavulavirus</i>  | F4                                                       | AY129676.1  |
| 100 | Avian paramyxovirus 2(APMV-2) | <i>Metaavulavirus</i>  | APMV2/chicken/Jordan/MQA-N-1/2020                        | ON858805.1  |
| 101 | Avian paramyxovirus 2(APMV-2) | <i>Metaavulavirus</i>  | APMV-2/macaw/Taiwan/Q35-SG/2009                          | MZ802792.1  |
| 102 | Avian paramyxovirus 2(APMV-2) | <i>Metaavulavirus</i>  | APMV-2/Emberiza spodocephala/China/Daxinganling/974/2013 | KT071757.1  |
| 103 | Avian paramyxovirus 3(APMV-3) | <i>Paraavulavirus</i>  | turkey/Wisconsin/68                                      | EU782025.1  |
| 104 | Avian paramyxovirus 3(APMV-3) | <i>Paraavulavirus</i>  | APMV3/PKT/Netherland/449/75                              | EU403085.1  |
| 105 | Avian paramyxovirus 4(APMV-4) | <i>Paraavulavirus</i>  | APMV-4/KR/YJ/06                                          | NC_074766.1 |
| 106 | Avian paramyxovirus 4(APMV-4) | <i>Paraavulavirus</i>  | APMV-4/Anseriformes/Taiwan/AHRI36/2009                   | MZ802793.1  |
| 107 | Avian paramyxovirus 4(APMV-4) | <i>Paraavulavirus</i>  | APMV4/duck/China/G302/2012                               | KC439346.1  |
| 108 | Avian paramyxovirus 4(APMV-4) | <i>Paraavulavirus</i>  | APMV4/mallard/Belgium/15129/07                           | JN571485.1  |
| 109 | Avian paramyxovirus 4(APMV-4) | <i>Paraavulavirus</i>  | Uria_aalge/Russia/Tyuleny Island/115/2015                | KU601399.1  |
| 110 | Avian paramyxovirus 4(APMV-4) | <i>Paraavulavirus</i>  | APMV-4/european wigeon/Amur region/Russia/74b/2019       | MW959117.1  |
| 111 | Avian paramyxovirus 4(APMV-4) | <i>Paraavulavirus</i>  | APMV-4/Egyptian goose/South Africa/N1468/2010            | JX133079.1  |
| 112 | Avian paramyxovirus 4(APMV-4) | <i>Paraavulavirus</i>  | APMV-4/Mallard/LBM/Korea/019/2012                        | KY681684.1  |
| 113 | Avian paramyxovirus 4(APMV-4) | <i>Paraavulavirus</i>  | APMV-4/Anas sp./Japan/10UO0481/2010                      | KT732302.1  |
| 114 | Avian paramyxovirus 4(APMV-4) | <i>Paraavulavirus</i>  | APMV-4/mallard/Novomychalivka/Ukraine/9-23-12/2010       | KT732339.1  |
| 115 | Avian paramyxovirus 5(APMV-5) | <i>Metaavulavirus</i>  | APMV-5/budgerigar/Japan/TI/75                            | LC168750.1  |
| 116 | Avian paramyxovirus 5(APMV-5) | <i>Metaavulavirus</i>  | budgerigar/Kunitachi/74                                  | GU206351.1  |
| 117 | Avian paramyxovirus 6(APMV-6) | <i>Metaavulavirus</i>  | APMV-6/Anseriformes/Taiwan/AHRI109/2016                  | MZ802803.1  |
| 118 | Avian paramyxovirus 6(APMV-6) | <i>Metaavulavirus</i>  | rAPMV-6-HK199/YmHA                                       | LC187308.1  |

|     |                                 |                        |                                               |             |
|-----|---------------------------------|------------------------|-----------------------------------------------|-------------|
| 119 | Avian paramyxovirus 6(APMV-6)   | <i>Metaavulavirus</i>  | rAPMV-6-HK199                                 | LC187307.1  |
| 120 | Avian paramyxovirus 6(APMV-6)   | <i>Metaavulavirus</i>  | APMV-6/duck/HongKong/18/199/77                | EU622637.2  |
| 121 | Avian paramyxovirus 6(APMV-6)   | <i>Metaavulavirus</i>  | APMV-6/duck/Taiwan/Y1/98                      | AY029299.1  |
| 122 | Avian paramyxovirus 6(APMV-6)   | <i>Metaavulavirus</i>  | teal/Novosibirsk region/455/2009              | KT962980.1  |
| 123 | Avian paramyxovirus 6(APMV-6)   | <i>Metaavulavirus</i>  | mallard/Jilin/190/2011                        | JX522537.1  |
| 124 | Avian paramyxovirus 6(APMV-6)   | <i>Metaavulavirus</i>  | mallard/Jilin/127/2011                        | KF267717.1  |
| 125 | Avian paramyxovirus 6(APMV-6)   | <i>Metaavulavirus</i>  | red-crested pochard/Balkhash/5842/2013        | KP762799.1  |
| 126 | Avian paramyxovirus 6(APMV-6)   | <i>Metaavulavirus</i>  | APMV-6/Goose/FarEast/4440/2003                | EF569970.1  |
| 127 | Avian paramyxovirus 7(APMV-7)   | <i>Metaavulavirus</i>  | APMV-7/dove/Tennessee/4/75                    | FJ231524.1  |
| 128 | Avian paramyxovirus 8(APMV-8)   | <i>Metaavulavirus</i>  | goose/Delaware/1053/76                        | NC_039195.1 |
| 129 | Avian paramyxovirus 8(APMV-8)   | <i>Metaavulavirus</i>  | APMV-8/Little stint/Kazakhstan/14/2013        | MF448515.1  |
| 130 | Avian paramyxovirus 8(APMV-8)   | <i>Metaavulavirus</i>  | APMV-8/WildBird/Anhui/a596/2021               | OR271279.1  |
| 131 | Avian paramyxovirus 8(APMV-8)   | <i>Metaavulavirus</i>  | APMV-8/whooper swan/Kazakhstan/95/2013        | MF448514.1  |
| 132 | Avian paramyxovirus 8(APMV-8)   | <i>Metaavulavirus</i>  | APMV-8/White fronted Goose/Kazakhstan/92/2013 | MF448512.1  |
| 133 | Avian paramyxovirus 8(APMV-8)   | <i>Metaavulavirus</i>  | APMV-8/White fronted Goose/Kazakhstan/62/2013 | MF448511.1  |
| 134 | Avian paramyxovirus 8(APMV-8)   | <i>Metaavulavirus</i>  | APMV-8/pintail/Wakuya/20/78                   | JX901129.1  |
| 135 | Avian paramyxovirus 8(APMV-8)   | <i>Metaavulavirus</i>  | APMV-8/Goose/Delaware/1053/76                 | FJ619036.1  |
| 136 | Avian paramyxovirus 8(APMV-8)   | <i>Metaavulavirus</i>  | pintail/Wakuya/20/78                          | FJ215864.1  |
| 137 | Avian paramyxovirus 8(APMV-8)   | <i>Metaavulavirus</i>  | APMV-8/WildDuck/InnerMongolia/H316/2015       | OR271282.1  |
| 138 | Avian paramyxovirus 9(APMV-9)   | <i>Orthoavulavirus</i> | APMV-9/Anas sp./Japan/9UO0485/2009            | KT867086.1  |
| 139 | Avian paramyxovirus 9(APMV-9)   | <i>Orthoavulavirus</i> | duck/New York/22/1978                         | NC_025390.1 |
| 140 | Avian paramyxovirus 9(APMV-9)   | <i>Orthoavulavirus</i> | APMV-9/Mallard/Ningxia/n234/2018              | OR271283.1  |
| 141 | Avian paramyxovirus 9(APMV-9)   | <i>Orthoavulavirus</i> | PMV-9/mallard/Italy/6226/2008                 | GU068584.1  |
| 142 | Avian paramyxovirus 9(APMV-9)   | <i>Orthoavulavirus</i> | PMV-9/pintail/Italy/493/2004                  | GU068586.1  |
| 143 | Avian paramyxovirus 9(APMV-9)   | <i>Orthoavulavirus</i> | PMV-9/widgeon/Italy/6436/2008                 | GU068585.1  |
| 144 | Avian paramyxovirus 9(APMV-9)   | <i>Orthoavulavirus</i> | PMV-9/mallard/Italy/5709/2007                 | GU068587.1  |
| 145 | Avian paramyxovirus 9(APMV-9)   | <i>Orthoavulavirus</i> | APMV-9/Anas sp./Japan/11OG0839/2011           | KT867087.1  |
| 146 | Avian paramyxovirus 10(APMV-10) | <i>Metaavulavirus</i>  | penguin/Falkland Islands/324/2007             | HM147142.3  |
| 147 | Avian paramyxovirus 10(APMV-10) | <i>Metaavulavirus</i>  | rAPMV-10-FI324/YmHA                           | LC187310.1  |
| 148 | Avian paramyxovirus 10(APMV-10) | <i>Metaavulavirus</i>  | rAPMV-10-FI324                                | LC187309.1  |
| 149 | Avian paramyxovirus 10(APMV-10) | <i>Metaavulavirus</i>  | APMV-10/penguin/Falkland Islands/323/2007     | HM755886.2  |
| 150 | Avian paramyxovirus 10(APMV-10) | <i>Metaavulavirus</i>  | APMV-10/Penguin/Falkland Islands/539/2007     | HM755888.2  |
| 151 | Avian paramyxovirus 10(APMV-10) | <i>Metaavulavirus</i>  | APMV-10/Penguin/Falkland Islands/437/2007     | HM755887.2  |
| 152 | Avian paramyxovirus 11(AMPV-11) | <i>Metaavulavirus</i>  | common_snipe/France/100212/2010               | JQ886184.1  |
| 153 | Avian paramyxovirus 12(AMPV-12) | <i>Orthoavulavirus</i> | Wigeon/Italy/3920_1/2005                      | KC333050.1  |
| 154 | Avian paramyxovirus 12(AMPV-12) | <i>Orthoavulavirus</i> | APMV-12/Anseriformes/Taiwan/AHRI101/2015      | MZ802804.1  |

|     |                                    |                        |                                                                |             |
|-----|------------------------------------|------------------------|----------------------------------------------------------------|-------------|
| 155 | Avian paramyxovirus 12(APMV-12)    | <i>Orthoavulavirus</i> | APMV-12/Anseriformes/Taiwan/AHRI143/2019                       | MZ802805.1  |
| 156 | Avian paramyxovirus 13(APMV-13)    | <i>Orthoavulavirus</i> | APMV-13/white fronted goose/Northern Kazakhstan/5751/2013      | KU646513.1  |
| 157 | Avian paramyxovirus 13(APMV-13)    | <i>Orthoavulavirus</i> | white-fronted goose/Ukraine/Prymorske/71-15-02/2013            | OQ286221.1  |
| 158 | Avian paramyxovirus 13(APMV-13)    | <i>Orthoavulavirus</i> | AOAV-13/Greater white-fronted goose/South Korea/E20-158-3/2020 | OK513542.1  |
| 159 | Avian paramyxovirus 13(APMV-13)    | <i>Orthoavulavirus</i> | AOAV-13/wild goose/China/Hubei/V93-1/2015                      | MN150295.1  |
| 160 | Avian paramyxovirus 13(APMV-13)    | <i>Orthoavulavirus</i> | white-fronted goose/Ukraine/Askania-Nova/48-15-02/2011         | KX119151.2  |
| 161 | Avian paramyxovirus 13(APMV-13)    | <i>Orthoavulavirus</i> | goose/Shimane/67/2000                                          | NC_030231.1 |
| 162 | Avian paramyxovirus 13(APMV-13)    | <i>Orthoavulavirus</i> | APMV-13/WildBird/Heilongjiang/x170/2018                        | OR271285.1  |
| 163 | Avian paramyxovirus 13(APMV-13)    | <i>Orthoavulavirus</i> | APMV-13/wildbird/Anhui/a435/2019                               | OR271284.1  |
| 164 | Avian paramyxovirus 13(APMV-13)    | <i>Orthoavulavirus</i> | Greater white-fronted goose/Korea/29-9/2017                    | MW492545    |
| 165 | Avian paramyxovirus 14(APMV-14)    | <i>Metaavulavirus</i>  | APMV14/duck/Japan/11OG0352/2011                                | NC_039015.1 |
| 166 | Avian paramyxovirus 14(APMV-14)    | <i>Metaavulavirus</i>  | chicken/Fujian/2160/2020                                       | MZ351191.1  |
| 167 | Avian paramyxovirus 14(APMV-14)    | <i>Metaavulavirus</i>  | chicken/Fujian/1013/2022                                       | OP094833.1  |
| 168 | Avian paramyxovirus 14(APMV-14)    | <i>Metaavulavirus</i>  | duck/Jiangxi/1232/2022                                         | OP094832.1  |
| 169 | Avian paramyxovirus 15(APMV-15)    | <i>Metaavulavirus</i>  | APMV-15/calidris_fuscicollis/Brazil/RS-1177/2012               | NC_034968.1 |
| 170 | Avian paramyxovirus 16(APMV-16)    | <i>Orthoavulavirus</i> | APMV-15/WB/Kr/UPO216/2014                                      | NC_039016.1 |
| 171 | Avian paramyxovirus 16(APMV-16)    | <i>Orthoavulavirus</i> | APMV-16/BeanGoose/Hubei/B926/2016                              | OR271292.1  |
| 172 | Avian paramyxovirus 16(APMV-16)    | <i>Orthoavulavirus</i> | APMV-16/WildDuck/Heilongjiang/x1061/2018                       | OR271290.1  |
| 173 | Avian paramyxovirus 16(APMV-16)    | <i>Orthoavulavirus</i> | APMV-16/WildBird/Anhui/a454/2019                               | OR271288.1  |
| 174 | Avian paramyxovirus 16(APMV-16)    | <i>Orthoavulavirus</i> | APMV-16/BeanGoose/Hubei/B931/2016                              | OR271293.1  |
| 175 | Avian paramyxovirus 16(APMV-16)    | <i>Orthoavulavirus</i> | APMV-16/WildBird/Anhui/a482/2019                               | OR271289.1  |
| 176 | Avian paramyxovirus 16(APMV-16)    | <i>Orthoavulavirus</i> | APMV-16/BeanGoose/Hubei/B281/2016                              | OR271294.1  |
| 177 | Avian paramyxovirus 16(APMV-16)    | <i>Orthoavulavirus</i> | APMV-16/white fronted goose/Central Kazakhstan/1791/2006       | MH423285.2  |
| 178 | Avian paramyxovirus 16(APMV-16)    | <i>Orthoavulavirus</i> | APMV-16/GTeal/Heilongjiang/x811/2018                           | OR271296.1  |
| 179 | Avian paramyxovirus 16(APMV-16)    | <i>Orthoavulavirus</i> | AOAV-16/emperor goose/Alaska/AK19-296/2019                     | MW161159.1  |
| 180 | Antarctic penguin virus A(APMV-17) | <i>Orthoavulavirus</i> | Adelie penguin 14                                              | MT025071.1  |
| 181 | Antarctic penguin virus A(APMV-17) | <i>Orthoavulavirus</i> | A                                                              | KY452442.1  |
| 182 | Antarctic penguin virus A(APMV-17) | <i>Orthoavulavirus</i> | Antarctic12                                                    | MT025076.1  |

|     |                                    |                        |                                                  |             |
|-----|------------------------------------|------------------------|--------------------------------------------------|-------------|
| 183 | Antarctic penguin virus B(APMV-18) | <i>Orthoavulavirus</i> | B                                                | NC_039018.1 |
| 184 | Antarctic penguin virus B(APMV-18) | <i>Orthoavulavirus</i> | AAvV-18/Adelie penguin/Antarctica/132/2013       | MK167230.1  |
| 185 | Antarctic penguin virus B(APMV-18) | <i>Orthoavulavirus</i> | AAvV-18/Adelie penguin/Antarctica/98/2013        | MK167229.1  |
| 186 | Antarctic penguin virus C(APMV-19) | <i>Orthoavulavirus</i> | C                                                | NC_039019.1 |
| 187 | Antarctic penguin virus C(APMV-19) | <i>Orthoavulavirus</i> | AAvV-19/Adelie penguin/Antarctica/167/2013       | MK167232.1  |
| 188 | Antarctic penguin virus C(APMV-19) | <i>Orthoavulavirus</i> | AAvV-19/Adelie penguin/Antarctica/96/2013        | MK167231.1  |
| 189 | Antarctic penguin virus C(APMV-19) | <i>Orthoavulavirus</i> | AAvV-19/Chinstrap penguin/Antarctica/661/2013    | MK167233.1  |
| 190 | Avian paramyxovirus 20(APMV-20)    | <i>Metaavulavirus</i>  | APMV-20/gull/Kazakhstan/5976/2014                | NC_040796.1 |
| 191 | Avian paramyxovirus 20(APMV-20)    | <i>Metaavulavirus</i>  | AAvV-20/great black headed gull/Atyrau/5541/2013 | MH844488.1  |
| 192 | Avian paramyxovirus 20(APMV-20)    | <i>Metaavulavirus</i>  | AAvV-20/black headed gull/Balkhash/5844/2013     | MH844489.1  |
| 193 | Avian paramyxovirus 21(APMV-21)    | <i>Orthoavulavirus</i> | APMV-21/Anseriformes/Taiwan/AHRI141/2019         | MZ802807.1  |
| 194 | Avian paramyxovirus 21(APMV-21)    | <i>Orthoavulavirus</i> | Cheonsu1510                                      | NC_076003.1 |
| 195 | Avian paramyxovirus 21(APMV-21)    | <i>Orthoavulavirus</i> | APMV-21/Anseriformes/Taiwan/AHRI83/2013          | MZ802806.1  |
| 196 | Avian paramyxovirus 21(APMV-21)    | <i>Orthoavulavirus</i> | APMV/dove/Taiwan/AHRI104/2016                    | MK677432.1  |
| 197 | Avian paramyxovirus 21(APMV-21)    | <i>Orthoavulavirus</i> | APMV/pigeon/Taiwan/AHRI128/2017                  | MK677433.1  |
| 198 | Avian paramyxovirus 21(APMV-21)    | <i>Orthoavulavirus</i> | APMV/dove/Taiwan/AHRI48/2010                     | MK677437.1  |
| 199 | Avian paramyxovirus 21(APMV-21)    | <i>Orthoavulavirus</i> | APMV/dove/Taiwan/AHRI58/2010                     | MK677443.1  |
| 200 | Avian paramyxovirus 21(APMV-21)    | <i>Orthoavulavirus</i> | APMV/dove/Taiwan/AHRI53/2010                     | MK677440.1  |
| 201 | Avian paramyxovirus 21(APMV-21)    | <i>Orthoavulavirus</i> | APMV/dove/Taiwan/AHRI33/2009                     | NC_076397.1 |
| 202 | Avian paramyxovirus 21(APMV-21)    | <i>Orthoavulavirus</i> | APMV/dove/Taiwan/AHRI55/2010                     | MK677442.1  |
| 203 | Avian paramyxovirus 22(APMV-22)    | <i>Metaavulavirus</i>  | APMV-22/dove/Taiwan/AHRI140/2019                 | MZ802809.1  |
| 204 | Avian paramyxovirus 22(APMV-22)    | <i>Metaavulavirus</i>  | APMV-22/pigeon/Taiwan/Q97-NL/2015                | MZ802808.1  |
