# Supplementary material for: Genetic Characterization of Avian Paramyxovirus Isolated from Wild Waterfowl in Korea between 2015 and 2021
Source: MDPI journal article supplement (doi:10.3390/ani14050780), 2024-03-01
Supplement: s1 [file s1]

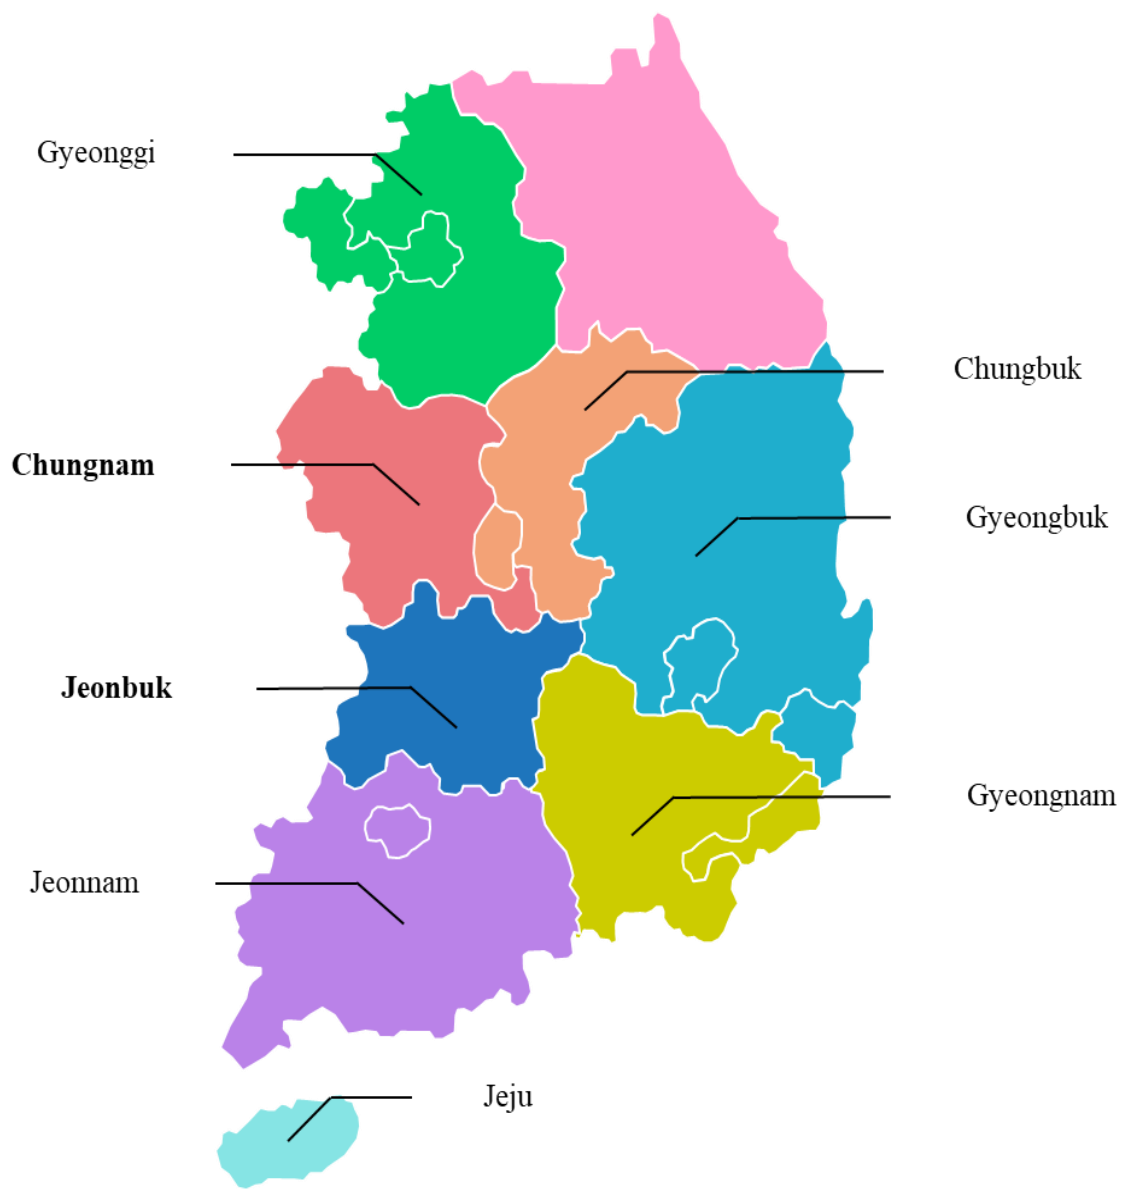

**Figure S1** | Locations of the areas where wild migrating birds were sampled. Regions where positive samples were detected are designated in bold.
