# Supplementary material for: Genetic Characterization of Avian Paramyxovirus Isolated from Wild Waterfowl in Korea between 2015 and 2021
Source: MDPI journal article supplement (doi:10.3390/ani14050780), 2024-03-01
Supplement: s1 [file s1]

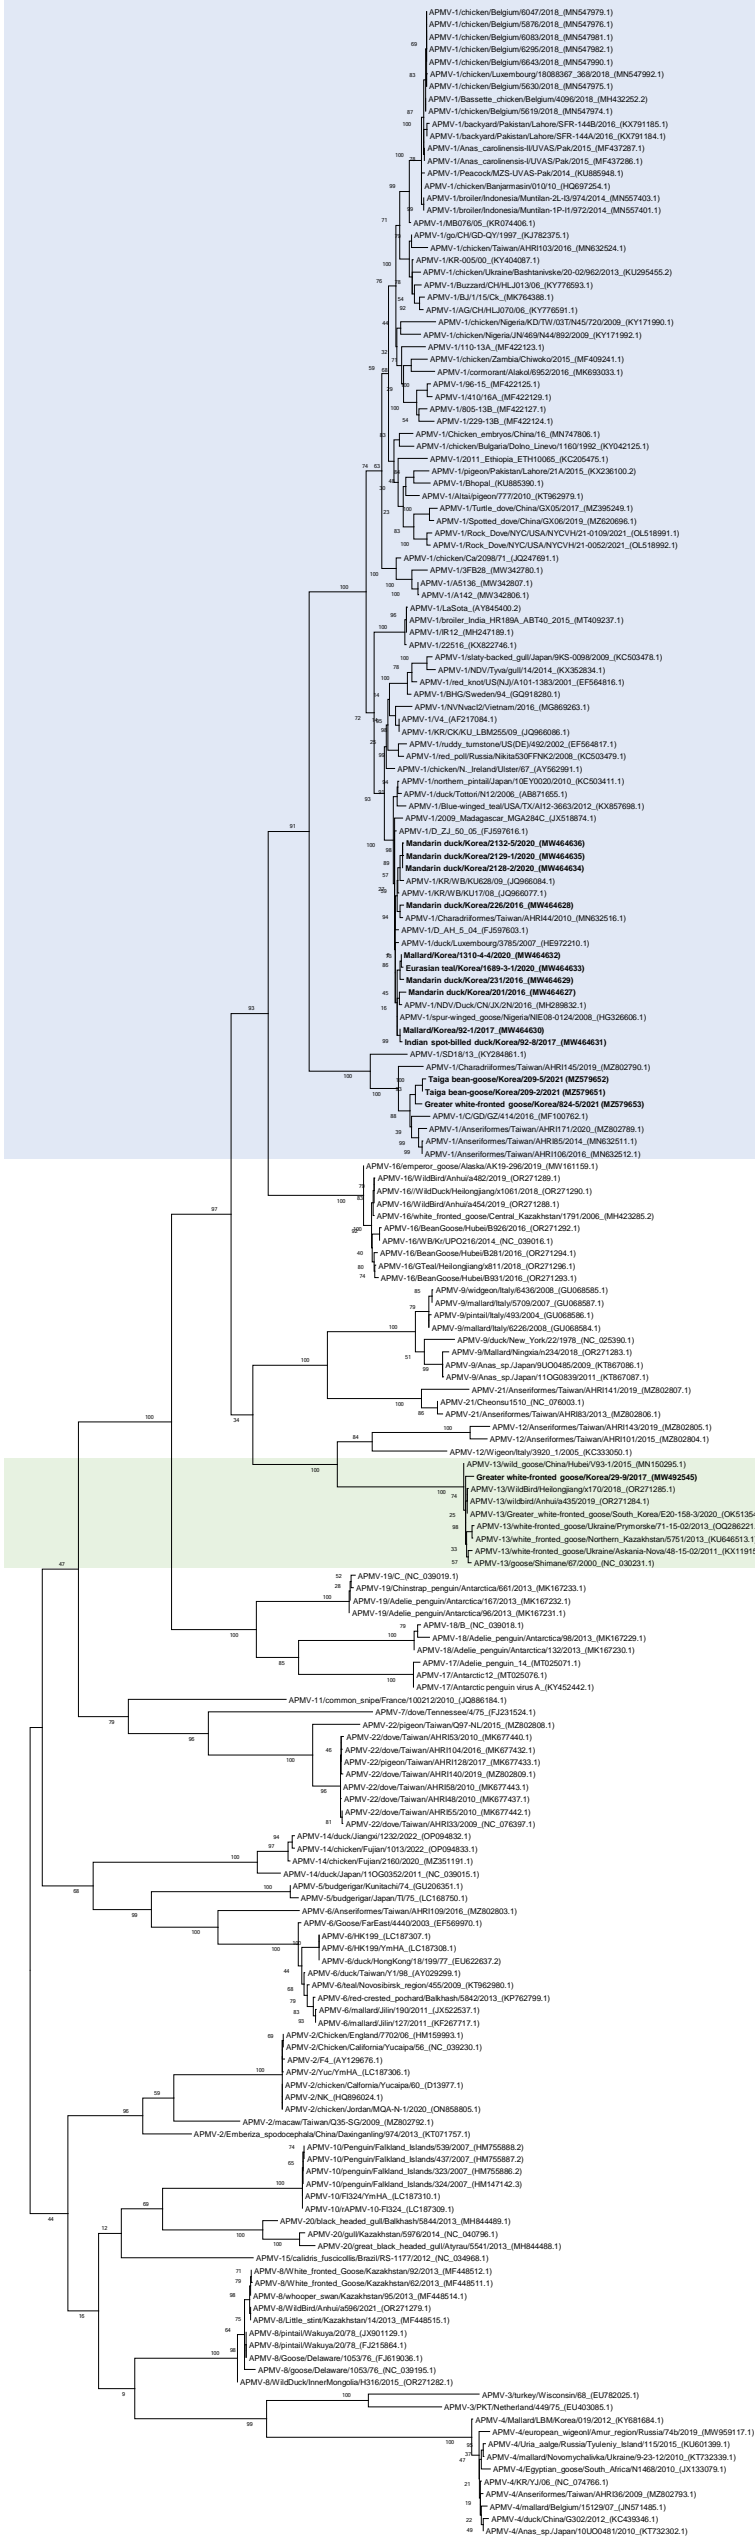

**Figure S2** | Phylogenetic analysis was conducted based on complete nucleotide sequences of fusion genes obtained from representative isolates of Avian paramyxovirus (APMV) serotypes 1-22. Viruses described in this study are designated in bold. The new (decimal naming) and the former names (alpha-numerical) of genotype or sub-genotype in APMV-1 are provided for easier comparison. The serotypes to which the newly isolated virus belongs are color-highlighted for emphasis.
